# Supplementary material for: Which Factors Determine Metal Accumulation in Agricultural Soils in the Severely Human-Coupled Ecosystem?
Source: MDPI journal article supplement (doi:10.3390/ijerph13050510), 2016-05-17
Supplement: s1 [file s1]

# Supplementary Materials: Which Factors Determine Metal Accumulation in Agricultural Soils in the Severely Human-Coupled Ecosystem?

Li Xu, Shanshan Cao, Jihua Wang and Anxiang Lu

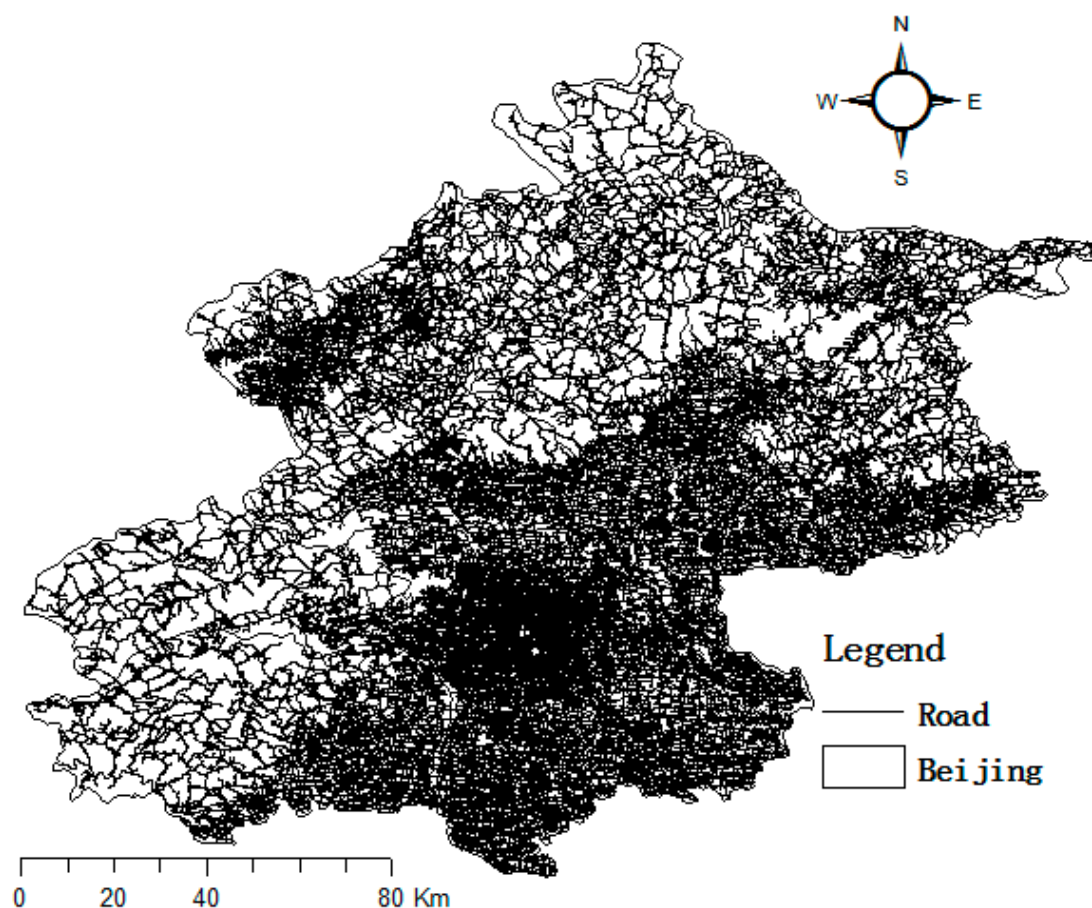

**Figure S1.** Road distribution in the study area.

**Table S1.** The results of ANOVA for two soil types (CCS and FAS) in the agricultural soil.

|              | As   | Cd   | Cu   | Hg   | Ni   | Pb   | Zn   |
|--------------|------|------|------|------|------|------|------|
| F            | 0.60 | 3.58 | 3.07 | 2.96 | 0.48 | 1.11 | 0.75 |
| Significance | 0.44 | 0.06 | 0.08 | 0.09 | 0.49 | 0.30 | 0.39 |

CCS: calcareous cinnamon soil; FAS: fluvo-aquic soil.

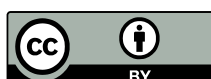

© 2016 by the authors; licensee MDPI, Basel, Switzerland. This article is an open access article distributed under the terms and conditions of the Creative Commons by Attribution (CC-BY) license (<http://creativecommons.org/licenses/by/4.0/>).
